# Supplementary material for: Genetic disruption of calpain-1 and calpain-2 attenuates tumorigenesis in mouse models of HER2+ breast cancer and sensitizes cancer cells to doxorubicin and lapatinib
Source: PubMed Central journal article supplement (PMC6161787; doi:10.18632/oncotarget.26078), 2018-09-07
Supplement: oncotarget-09-33382-s001.pdf [file oncotarget-09-33382-s001.pdf]

## Genetic disruption of calpain-1 and calpain-2 attenuates tumorigenesis in mouse models of HER2+ breast cancer and sensitizes cancer cells to doxorubicin and lapatinib

### SUPPLEMENTARY MATERIALS

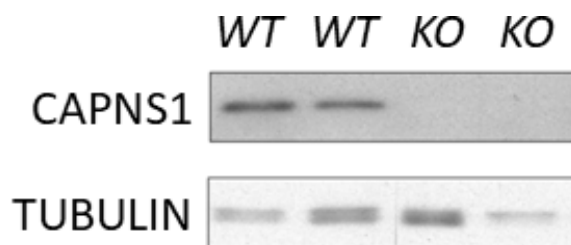

**Supplementary Figure 1: CAPNS1 expression is ablated in mammary tumors from NIC *capns1<sup>flx/flx</sup>* mice.** Tumor lysates from NIC *capns1<sup>flx/flx</sup>* (KO) or NIC *capns1<sup>+/+</sup>* (WT) female mice were assessed for CAPNS1 or tubulin expression by immunoblotting.

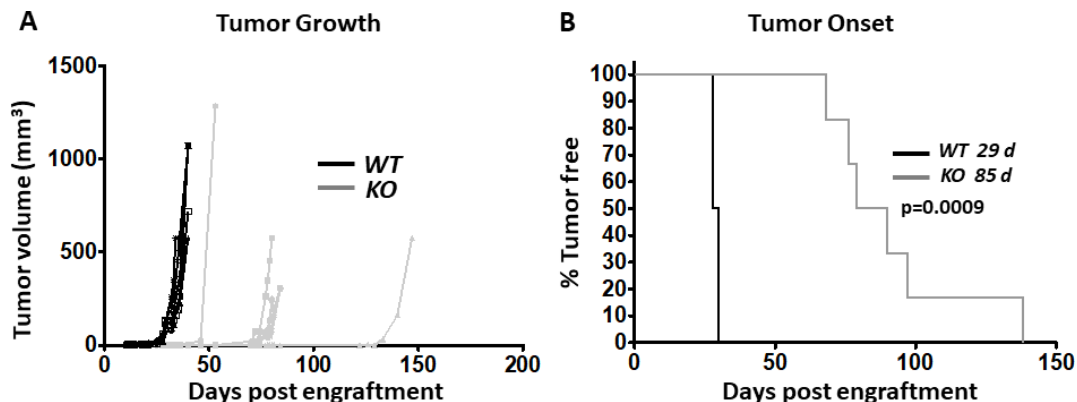

**Supplementary Figure 2: *capns1* KO is associated with reduced tumorigenic potential.** One  $\times 10^6$  *capns1* KO or WT MTECs were engrafted into the number four mammary glands of female *Rag2<sup>-/-</sup> IL-2R $\gamma$ <sup>-/-</sup>* mice ( $n = 6$  for each cohort). (A) Caliper measurements of tumor volumes. (B) Median time to onset of palpable tumors at the engraftment site were 85 or 29 days for KO and WT, respectively ( $p = 0.0009$ , Log-rank (Mantel-Cox) test). All tumors arising in the KO group displayed expression of *capns1* (data not shown).

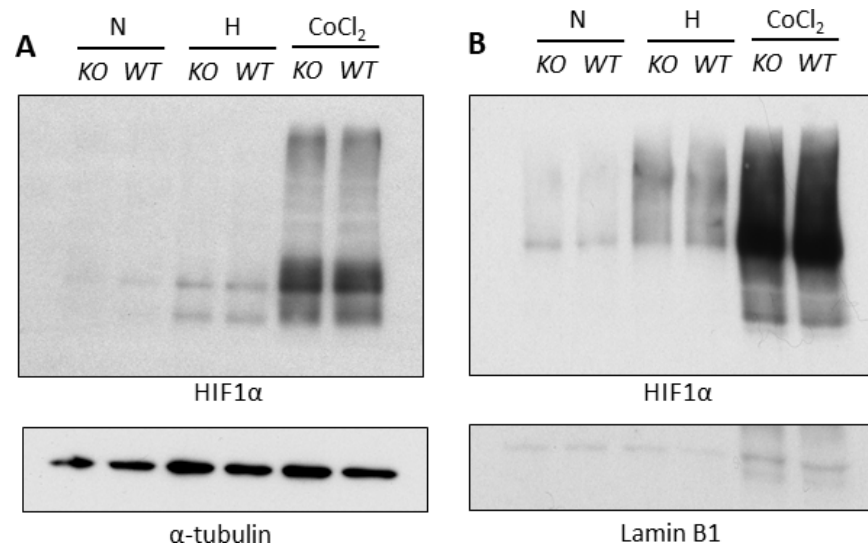

**Supplementary Figure 3: *capns1* knockout does not affect hypoxia-induced stabilization of HIF1α.** One and a half  $\times 10^6$  *capns1* KO or WT MTECs were seeded for 24 h under conditions of hypoxia (H) (0.1% O<sub>2</sub>), normoxia (N) (21% O<sub>2</sub>) or challenge with CoCl<sub>2</sub> (100  $\mu$ M). Lysates were collected and levels of HIF1 $\alpha$  were assessed by immunoblotting. Tubulin and nuclear Lamin B1 immunoblotting was performed to assess sample loading. (A) Whole cell lysate immunoblotting for HIF1 $\alpha$  (B) Nuclear enriched immunoblotting for HIF1 $\alpha$ .

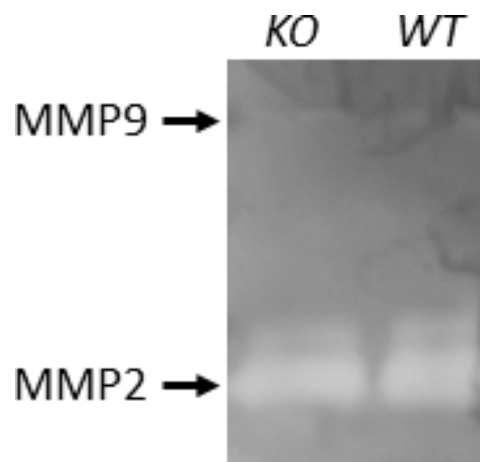

**Supplementary Figure 4: *capns1* KO does not affect secretion or activation of matrix metalloproteinases 2 and 9.** Seven  $\times 10^5$  *capns1* KO or WT MTECs were seeded and cultured overnight, then changed to serum-free medium the following day. Conditioned media was collected after 24 hours and gelatin zymography performed to assess MMP activity.
